# Supplementary material for: What is the Prevalence and Success of Remediation of Emergency Medicine Residents?
Source: PubMed Central journal article supplement (PMC4651579; doi:10.5811/westjem.2015.9.27357), 2015-10-22
Supplement: wjem-16-839-s001.pdf [file wjem-16-839-s001.pdf]

Anonymous self-report survey  
Staten Island University Hospital  
Consent for Participation in a Research Study

Study title: WHAT IS THE STATE OF REMEDIATION IN EMERGENCY MEDICINE RESIDENCY PROGRAMS?

This research survey is being conducted by Dr. Weizberg from Staten Island University Hospital on behalf of the CORD Remediation Task Force. We are conducting a research study about the state of remediation in Emergency Medicine residency programs. The following survey should take about 5 minutes to complete.

Participation is voluntary. If you would prefer not to participate, simply submit a blank survey. If you agree to participate, please complete the attached survey. Your responses are anonymous; do not put your name or other identifying information on this survey. We ask that you try to answer all questions. However, if there are any questions that you would prefer to skip, simply leave the answer blank.

Researcher contact information:

Name: Dr. Moshe Weizberg  
Title: Residency Director  
Dept: Emergency Medicine  
Staten Island University Hospital  
Phone: 718-226-1548  
Email: mweizberg@siuh.edu

This research has been reviewed by the Institutional Review Board (IRB). If you have any questions about your rights as a participant, or if you feel that your rights have been violated, please contact the IRB at 516-321-2100.

1. What is the length of your program?

- 3 years
- 4 years

2. How many total residents are in your program?

FOR THE FOLLOWING QUESTIONS, PLEASE INCLUDE BOTH FORMAL AND INFORMAL REMEDIATION

3. In the last 3 years, how many residents in your program have been on remediation?



6. For each resident, please describe the issues that resulted in their being placed on remediation?

|              |                      |
|--------------|----------------------|
| Resident #1  | <input type="text"/> |
| Resident #2  | <input type="text"/> |
| Resident #3  | <input type="text"/> |
| Resident #4  | <input type="text"/> |
| Resident #5  | <input type="text"/> |
| Resident #6  | <input type="text"/> |
| Resident #7  | <input type="text"/> |
| Resident #8  | <input type="text"/> |
| Resident #9  | <input type="text"/> |
| Resident #10 | <input type="text"/> |

7. Is your program less than 3 years old (since inception)?

- Yes
- No

---

8. How many years old is your program (since inception)?

---

9. Please enter any comments below.
